# Supplementary material for: S4S8-RPA phosphorylation as an indicator of cancer progression in oral squamous cell carcinomas
Source: PubMed Central journal article supplement (PMC5354728; doi:10.18632/oncotarget.14001), 2016-12-16
Supplement: oncotarget-08-9243-s001.pdf [file oncotarget-08-9243-s001.pdf]

## S4S8-RPA phosphorylation as an indicator of cancer progression in oral squamous cell carcinomas

### Supplementary Materials

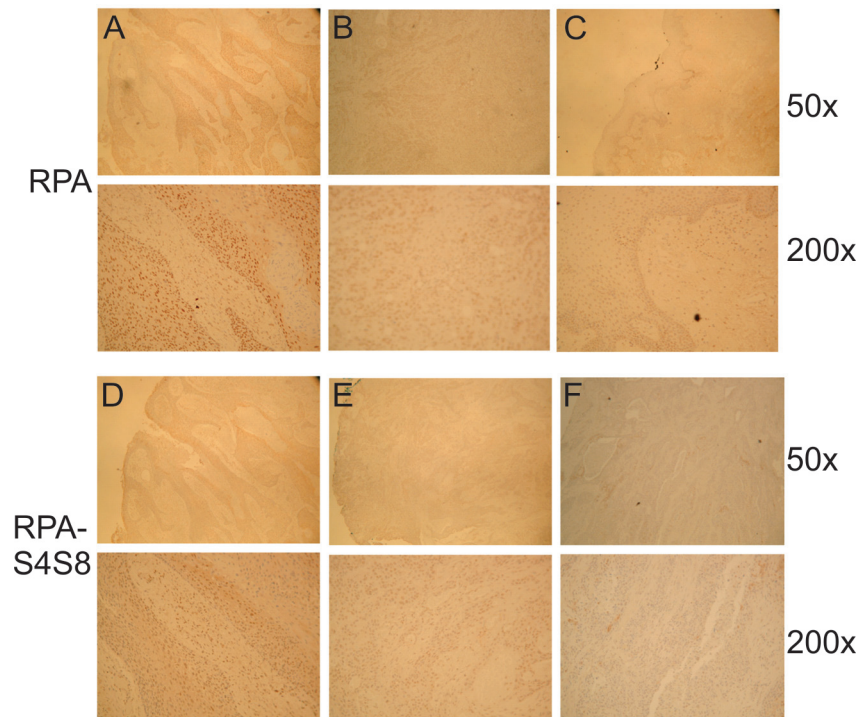

**Supplementary Figure S1:** Representative images of RPA (A, B, C) and S4S8-RPA (D, E, F) staining observed in OSCC via immunohistochemistry. Examples of representative of high (A, D), medium (B, E) and low (C, F) antibody signal at 50X and 200X.
